# Supplementary material
Source: PubMed Central journal article supplement (PMC2516554)
Supplement: NIHMS61476-supplement-si20060825_043.pdf [file NIHMS61476-supplement-si20060825_043.pdf]

**Supplemental Figure 3:** Dose dependent inhibition, by antisera to both b5R and cyt b5, of cytochrome c reduction (a marker of the b5R/cyt b5 pathway) in pooled HLM. Cytochrome c reduction was measured as the change in absorbance at 550 nm, in the presence of NADH (1). 8  $\mu$ g of HLM per reaction. Activities were blanked for absorbance without NADH, and were measured over a 5 minute time period over which reduction was linear.

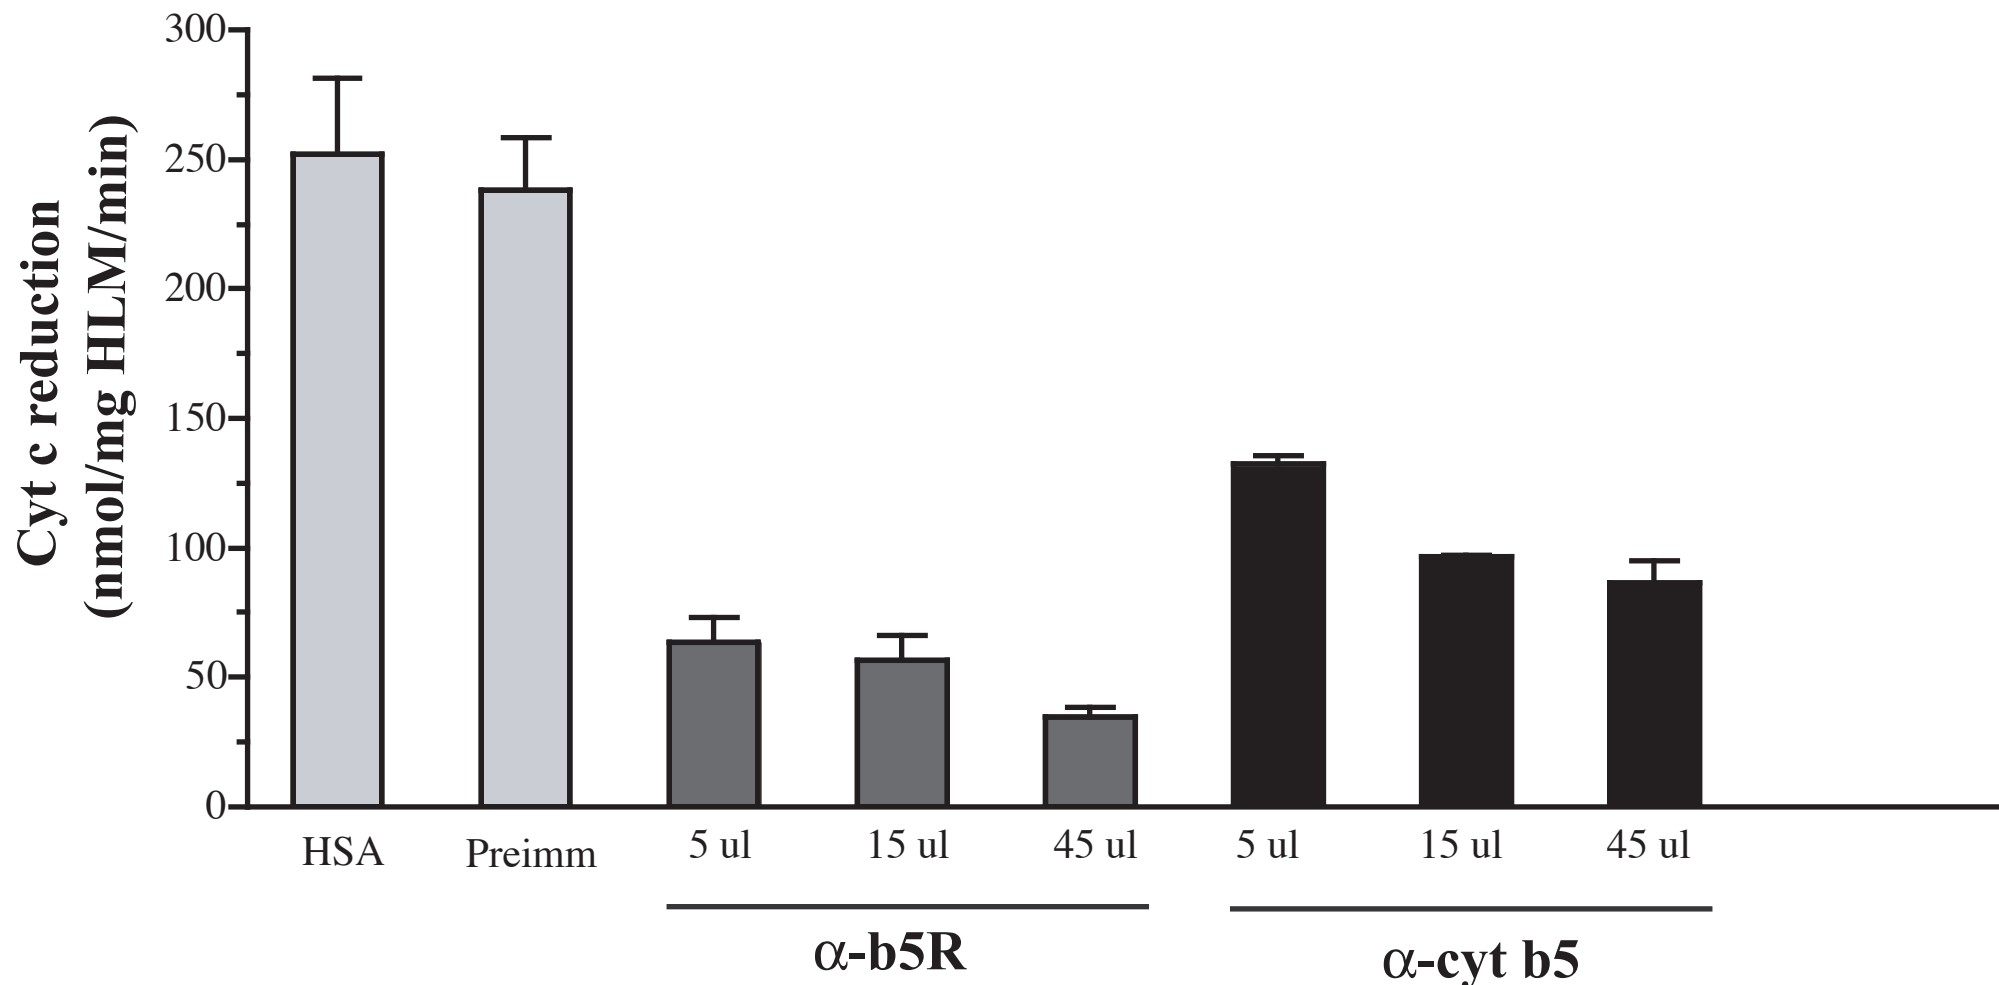

### Antibody pre-treatment of HLM

1. Fitzsimmons, S., et al. (1996) Reductase enzyme expression across the NCI tumor cell line panel: correlation with sensitivity to mitomycin C and EO9. *J Natl Cancer Inst.* 88, 259-269.
